# Supplementary material for: Involvement of Estrogen Receptor-α in the Activation of Nrf2-Antioxidative Signaling Pathways by Silibinin in Pancreatic β-Cells
Source: PubMed Central journal article supplement — Biomol Ther (Seoul). 2019 Oct 25;28(2):163–71. doi: 10.4062/biomolther.2019.071 (PMC7059807; doi:10.4062/biomolther.2019.071), 2019-10-25
Supplement: BT-18-163_supple.pdf [file BT-18-163_supple.pdf]

# Supplemental Figure 1

**A**

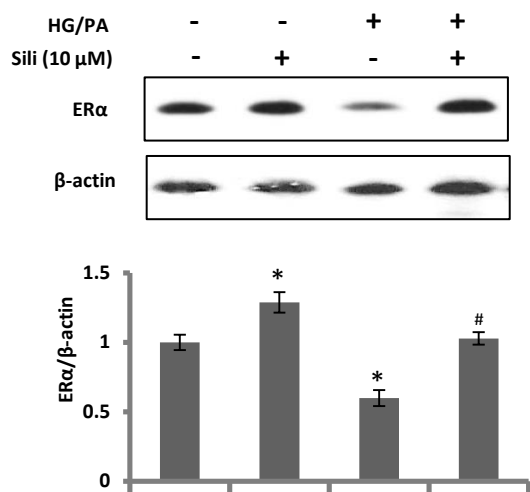

**B**

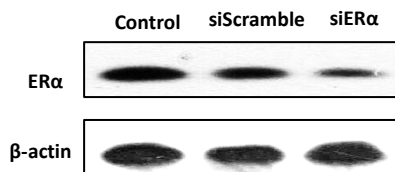

**D**

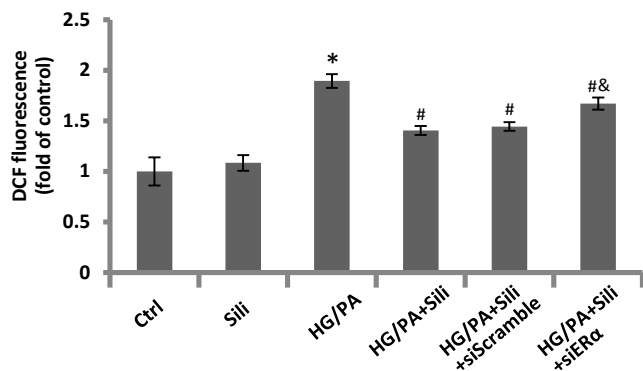

**C**

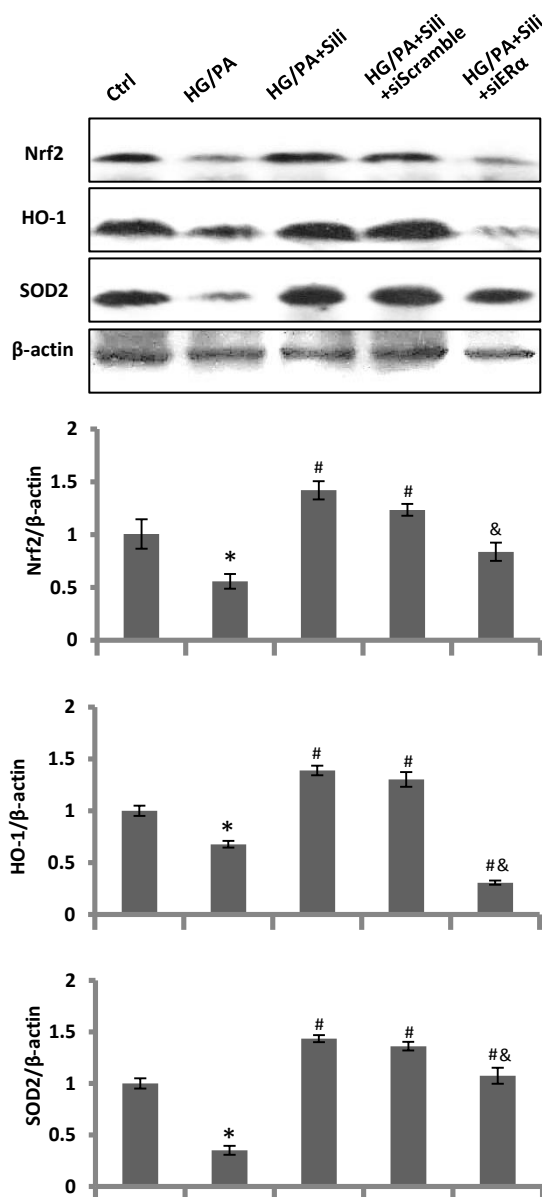

Supplemental Figure 1. Silibinin increases the expression of Nrf2, HO-1 and SOD2, and decreases ROS production in an ER $\alpha$ -dependent manner in NIT-1 cells. (A) NIT-1 cells received indicated treatments, and the expression of ER $\alpha$  was examined by Western blot analysis. (B) NIT-1 cells were transfected with ER $\alpha$  siRNA or control siRNA, and ER $\alpha$  protein expression was examined by Western blot assay 48 h after transfection. (C) The expression of Nrf2, HO-1, and SOD2 of NIT-1 cells with administration of silibinin and/or siRNA transfection was examined by Western blot assay. (D) ROS production from NIT-1 cells with administration of silibinin and/or siRNA transfection was measured with DCFH-DA probe. Serum albumin (0.3% BSA) was present under all conditions. HG/PA, high glucose and palmitate/BSA; Sili, silibinin. Data are mean  $\pm$  SEM of 3 independent experiments. \* $P$  < 0.05 vs. control group; # $P$  < 0.05 vs. HG/PA group; & $P$  < 0.05 vs. HG/PA + Sili group.
